# Supplementary material for: Fasciclin 2 engages EGFR in an auto-stimulatory loop to promote imaginal disc cell proliferation in Drosophila
Source: PLoS Genet. 2022 Jun 6;18(6):e1010224. doi: 10.1371/journal.pgen.1010224 (PMC9203005; doi:10.1371/journal.pgen.1010224)
Supplement: S1 Text — (DOCX) [file pgen.1010224.s007.docx]

**SUPPLEMENTARY MATERIALS AND METHODS**

**Strains used for coupled-MARCM analysis**

*y QS13F FRT19A/FM7-GFP; QF-ET40 QUAS-mtdTomato/CyO*

*y fas2eB112 QS13F FRT19A/FM7-GFP; QF-ET40 QUAS-mtdTomato/CyO*

*y fas2eB112 QS13F FRT19A/FM7-GFP; UAS-bskRNAi#32977*

*y fas2eB112 QS13F FRT19A/FM7-GFP; UAS-*λ*Egfr/TM6B*

*y fas2eB112 QS13F FRT19A/FM7-GFP; UAS-yki/TM6B*

*y fas2eB112 QS13F FRT19A/FM7-GFP; UAS-InRDEL/TM6B*

*y fas2eB112 QS13F FRT19A/FM7-GFP; UAS-InR418P/TM6B*

*w hsp-flp Tub-GAL80 FRT19A; Tub-GAL4 UAS-GFP/TM6B*

**Strains for MARCM analysis**

*y fas2eB112 sn3 FRT19A/FM7-GFP; UAS-GFP; MS1075-GAL4* (used for clones in adults)

*y fas2eB112 FRT19A/FM7-GFP; TRE-DsRed*

*w hsp-flp Tub-GAL80 FRT19A; UAS-X* (*UAS-X* represents the different UAS constructs

presented in Results)

*w hsp70-flp Tub-GAL80 FRT19A; puc-LacZE69/TM6B*

*w hsp70-flp Tub-GAL80 FRT18A; TRE-DsRed*

*Strains for FLP-OUT clone analysis*

*y w ey-flp; Act5C-FRTy+FRT-GAL4 UAS-GFP/CyO*

*y w hsp70-flp; Act5C-FRTy+FRT-GAL4 UAS-GFP/CyO*

*y w hsp70-flp; Act5C-FRTy+FRT-GAL4 UAS-GFP/CyO; UAS-fas2RNAi34084*

*y w hsp70-flp; Act5C-FRTy+FRT-GAL4 UAS-GFP*; *puc-LacZE69/TM3*

*y w hsp70-flp; Act5C-FRTy+FRT-GAL4 UAS-LacZ*

*y w hsp70-flp; Act5C-FRTy+FRT-GAL4 UAS-LacZ*/SM6a-TM6B/*UAS-bskRNAi31476*

*y w fas2::GFP; UAS-EGFR*

**Other strains to study fas2– clones in the adult and with the Minute technique**

*y fas2eB112 f36a FRT18A/FM7c* (used for clones in adults)

*w sn3 FRT18A; hsp-flp* (used for clones in adults)

*w M(1)Osp FRT18A/FM7; hsp70-flp; Dp(1;3)A59*/*TM6B* (used for clones in adults)

*Ubi-GFP M(1)Osp FRT19A/FM7a; hsp70-flp*

*Ubi-GFP M(1)Osp FRT18A/FM7a; TRE-DsRed*

*Ubi-GFP FRT18A/FM7a; TRE-DsRed*

*fas2eB112 FRT19A/FM7, GFP; hsp70-fas2TRM31.2/TM6B*

*fas2eB112 FRT18A/FM7, GFP; hsp70-fas2TRM31.2/TM6B*
